# Supplementary material for: Apigenin mediated gold nanoparticle synthesis and their anti-cancer effect on human epidermoid carcinoma (A431) cells
Source: Royal Society of Chemistry journal article supplement (doi:10.1039/c5ra04303d), 2015-01-01
Supplement: c5ra04303d1.pdf [file c5ra04303d1.pdf]

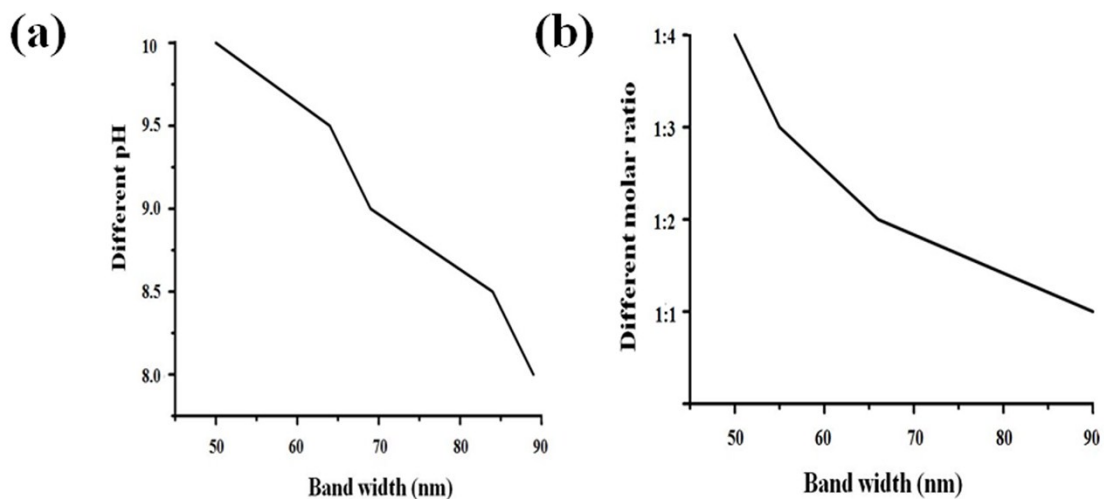

**Fig. S1** Comparison of bandwidth values of ap-AuNPs (a) at different pH (molar ratio 1:4) (b) at different molar ratio (pH 10).

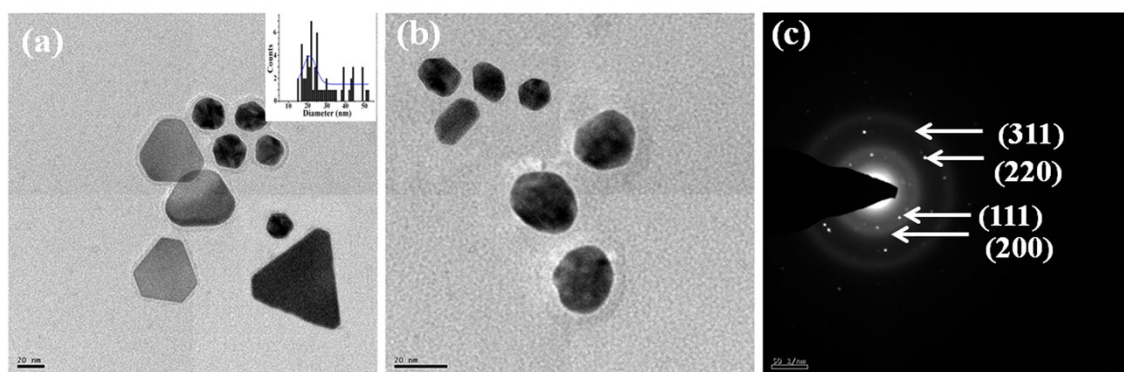

**Fig. S2** Morphology of ap-AuNPs prepared at pH 9 as analysed through HR-TEM (a & b) Different shapes of ap-AuNPs and inset shows the size distribution histogram (c) The SAED pattern of Au in the ap-AuNPs.

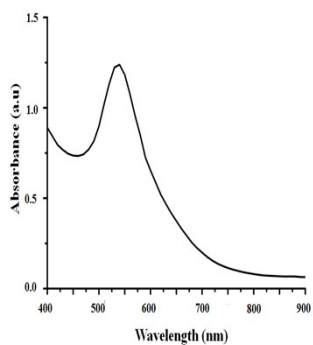

**Fig. S3** UV- visible spectra of ap-AuNPs showing stability at pH 10 after 3 months

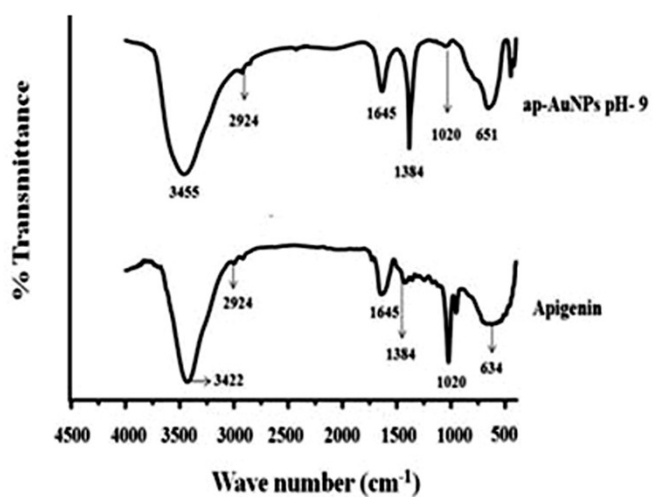

**Fig. S4** FTIR spectra of apigenin and ap-AuNPs prepared using apigenin at pH 9

(a)

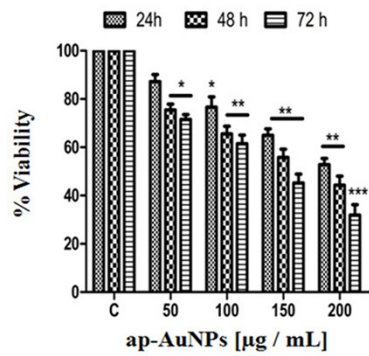

(b)

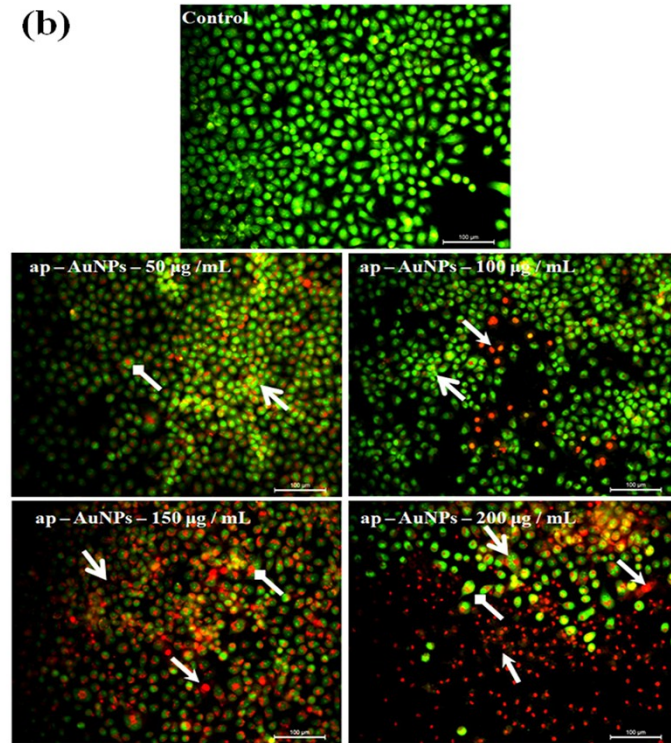

**Fig. S5** Effect of ap-AuNPs on SiHa cells (a) Viability assay using MTT (b) Fluorescence micrographs using EtBr/AO staining of SiHa cells for 48 h. The morphological changes are indicated as early apoptotic (→), late apoptotic (→◆) and necrotic cells (→)
